# Supplementary material
Source: PubMed Central journal article supplement (PMC3587263)
Supplement: 1215787110_sd01.pdf [file 1215787110_sd01.pdf]

## **Bos taurus endogenous retroviral envelope genes**

>bos-env1

ATGGAGCTGGGTAAGCGACTCCTGCTACTTGGCTTCACCAACGCAATTCTGAACCTGACC  
ACTGTCCCAGTACAGGGCAACATCTTCATCTCATGGGCACATTCTTACGCGAACTTCCAC  
AACTCCTCCAATTGTTGGGTATGTGGGGCTATGCCCTGTGAGTAATGGACGGACTCCCC  
TGGTGGGTATCGCCACTTCATGATGGAGACTTTCTACCACTGTGTTCTTTCTTGGAAACA  
CAGAAAGGAACTTTCATTTCTCTCAGCAATCATGATCTTTCTTTGCTCCCCTGGTGTAAG  
AAAGAGCCATCAATGGGCCTGGGACATGGGGTTACATTTAGCATGAACGCTAGTCTTAAG  
GCACTAACAAGTGCTTATAACTCATATATGAGCAATGGACAGAAGAACAGCACCCCTACA  
AAAGAGGAACAGACCTTCCGGTACCATGAGGTATACTACCAGGTCTGGGATGAATATTTT  
TGGATGACTTCTGAGAGAGGACAGGTGATTACTCGTGCTACAATTTGCTGGGAACAAAA  
GAACACAAAATTGGATTTGGAGACCACCCCTAAACCCAAAAGATTTAAAATATATGGGT  
TATTTGTCCGCTGAACAATGTAAACAAATCTTGGACGTAACCTATCACCCAGTCCGGTCT  
GCTCAGTGGCCCGTTCGACTGGAAATATAGTCCCGGAATCCGCTGGGTAGCCCCAAC  
GGGACCAAGTGGCTCTGTGGCCCTAACTTATGGCCATGGTTACCAGTTGGCTGGGTAGGG  
CGTTGCACACTAGGGTTTGTTTTCGCCCTGGCAGAATTAAGCCTAGCCTACACCATCCT  
CCAGCAAACCTGCCCTATCTGCATGCAAGATGGACACGATCCACGTTCCAGTGGTATGAC  
TATCTTGCTGGCTTCTTTGTACCCTCTATAGGGACAGCGGATATCATGGTTAAGGTAGAG  
GCCTTAAATAATTTCACTAAACAGGCCCTCTTAGACAGTAAAAAGCCATTGAAGCTTTG  
AACGAAGAACAATCTCAGATGAGGAAGGCAGTAATGCAAAATAGGATGGCATTAGACATA  
CTCACAGCAGCCAGGGGGAACTTGTGCCATAATTAAGTCAATGTTGTGTATACATC  
CCTGACCTGTCTGGAAATGTATCTGCTGCCATGGAGGATATGCAAAAACAAGTGAAAGCC  
ATGTCTGGTGAAAATATTCCTTTTTGGACTTCGATCCTGTCTGGGTAAAGGGAGACTGG  
TGAAAACCTATTGTAAATGTTGTTATAGTATTCTTAATCATACTGGTTTTGTGGCCCTGC  
TTGTTACAATGCCTTGTGAATTTTGTAAACCAGAGGTTGGTAGCATTCTCTCATGCGGTT  
GCCCATAGGACTAACGTACAATCTACCTCTAAGTGA

>Bos-env2-chr1

ATGAAACACCTGATCACGATTGTTCTCAATTTTCCTAACTTTAAACTATGCAGCTCGGGAG  
GATCTAAAGGATATCCATTAGACAATCCTGACATGGAAATATTTACAGATGGCAGTTCT  
TTTGTTTCCAGGATGGAAAGCGTAAAGCGGGTTATGCCGTGGTGACTGCTGAACAGGTTTTA  
GAAGCAAAATCTCTCCCCAGGGAAGTGTGCTCAGTTAGCGGAGCTCGTGGCCCTGACC  
CGAGCTCTAGAATTAAGCAAAGGGCAGCGGATGGGCCTGATAATCTATATGAGTCTACTT  
CTGCTGACTCCAAATATCCTGAGTCTGCCCTTGGATCCTCAAGACAATGTCTTCCCTGTCC  
TGGGCTCACTCCTATGCTGCATTCCACAATCAGTCTAACTGCTGGGTCTGCAGAGAGCTC  
CCCTCTTCGTCAGTGGAAAGGCTTCCCTGTGGTGGACATCCCCACTTCAAGAAAAAGACTTT  
CTCCAAGTCTGTGAATACCTTCGACAACAATCACATGCGATGCCTCTTCGTATCTGATG  
ACATCTACCAACCTAAAATGGACTGGTGCAACACTTTGTACTCTAACTATGGACATAAT  
GTGACTTTTAAATTTTGAATTATACATTGTCTCGGTTCAATGACTATTTTGTACATATAAG  
GAAAATAGGTCTAGATCTAATGGTTTTTTTACCTGACATTTATCAAATATGGGATGAGGTT  
ACATGGCTAACTCCTGAAAAAGGACATTTAATATCTACTGCCTCTATATGCTGGGAACAA  
ACAGAGCCGGCCCCAAAAGTTAGCCAACAACCTATTTACAATGATTGGAAACAAATGGGA  
TATTTGTCTCAGGAAACATGCAATGTAATCATTCCCGTGTTCCTCAATCCCAGTTCAGGT  
TCTCCCTTTGTCTGGCCAGGCACGAATTGGGACTGGATATCTCAGTCCGCGCTGGCTTGCT  
CCAAACGGGACTTATTGGATATGTGGCTTTACCTATGGGCATGGCTCCCCCTGGTTGG  
ATAGGGAGATGCACCCTGGGTCTAGCCTTTACTCATGGCTTTATATTTTTCAGAGCTTCCA  
GAAAAGCCTGCTAATTTACCCACCTTAAACTCAGTGGGCAAGGTCTGTATTTTATTGG  
TATGATTATTTGGCTGCAGCGTTTGTCCCTCTTTGGGAACTACAGATGTTATGTTACGA  
GTGGATGCTTTGACTAATTTTACTCAACAGGCATTACAAGATTCTCAAAGGCTATTTCA  
GCTCTTAATGCTGAACAAGCACAAATTAGAAAGGTGGTTTTACAAAACAGATTGGCTCTA  
GATATTCTGACAGCTGCACAAGGAGGAACCTTGTGCCATTATTCATACCCAATGCTGTACA  
TATATACCTGATATGAGCACGAACGTCACCTATTTACTAACCACATGAACAAGATGATT  
AGGGCCATGGACACTCCTGAAGCCTCAATTGCTTCACTTTGGAAAACGTTAACTAATTCC  
CCATGGTGGACAACCTATCTTAATTACAATAATTCTGGTTGTTTTGTTCTTGCTGTTTGCT  
CCCTGCATCTGTAATTGTATAACTGGATTTGTTTCTAGCCGAATGAAAGCTTTTAAAGTTA

CAAATGGTTGCTCAAACCTCTGCTACTGCTGTAGCTTCCTCCAGCTACTATTTGGGGCCC  
CTGGATCAGATATCCTCAATATGA

>bos-env2-chr10

ATGACAGACAGTAGGCTTCTTAAGTATCAGTCATTGTTGTTAGAAGGACCAGTAACTAAG  
CTTAAAGTTTGTGGAAATTTAAATCCTGCCACTTTCCTTCCTGAGAAGGAAAATGAAACA  
CCTGATCACGATTGTTCTCAATTCCTAACCTTAAACTATGCAGCTCGGGAGGATCTAAAG  
GATACCCCATTAGACAATCCGGACATGGAAATATTTACAGATGGCAGTTCCTTTGTTTCAG  
GATGGAAAGCGTAAAGCAGGTTATGCCGTGGTACTGCTGAACAGGTTTTGGAAGCAAAA  
TCTCTCCCCCAGGGAACCAGTGCTCAGTTAGTGGAGCTTGTGGCCCTGACCCGAGCTCTA  
GAGTTAAGCAAAGGGCAGCAGATGGGCCTGATAATCTATGTGAGTCTACTTCTGCTGACT  
CCAAATTTCTGAGTCTGCTGTTGTATCCTCAAGACAATATATTCCTGTCCTGGGCTCAC  
TCCTATGCTGCATTCCACAATCGGTCTAACTGCTGGGTCTGCGGAGCGCTCCCTCTTCG  
TCAGTGGAAAGGCTTCCCGTGGTGGACATCCCACTTCAAGGAAAAGACTTTCCTCAAGTC  
TGTGAATACCTTCGACAACAATCACATGCGATGCCTCTTCGTCATCTGATGACATCTACC  
AACCTAAAATGGACTGGTGCAACACTTTGTA CTAACTATGGACATAATGTGACTTTT  
AATTTTGATTATACATTGTCTCGGTTCAATGACTATTTTGCTACATATAAGGTAATAGG  
TCTAGATCTAATGGCTTTTTACCTGACATTTATCAAATATGGGATGAGGTTACATGGCTA  
ACTCCTGAAAAAGGACATTTAATATCTACTGCCTTTATGTGCTGGGAACAAACAGAGCCA  
TCCCCAAAAGTTAGCCAACA ACTTAATTACAATGATTGGAAACAAATGGGATATTTGTCT  
CAGGAAACATGCAATGTAATCATTCCCGTGTTCCTCAATCCCAGTTCAGGTTCTCCCTTT  
GTCTGGCCAGGCACGAATTGGGACTGGATATCTCAGTCGCGCTGGCTTGTCCAAACGGG  
ACTTATTGGATATGTGGCTCTTACCTATGGGCATGGCTCCCCCTGGTTGGATAGGGAGG  
TGCACCCTGGGTCTAGCCTTTACTCATGGCTTTATATTTTCAGAGCTTCAGAAAAGCCT  
GCTAATTTACCCACCTTAGAACTCGGTGGGCAAGGTCTGTATTTTATTGGTATGATTAT  
TTGGCTGCAGCGTTTGTCCCTCTTTGGGAACTACAGATGTTATGTTACGAGTGGATGCT  
TTGACTAATTTTACTCAACAGGCATTACAGGATTCTCAAAGGCTATTTTCAGCTCTTAAT  
GCTGAACAAGCACAAATTAGAAAGGTGGTTTTACAAAACAGATTGGCTCTAGATATTCTG  
ACAGCTGCACAAGGAGGAACTTGTGCCATTATTCATACCCAATACTGTACATATATACCT  
GATATGAGCACGAATGTTACTCATTTTACTAACCACATGAACAAGATGATTAGGGCCATG  
GACACTCCTGAAGCCTCAATTGCTTCACTTTGGAAAACGTTAACTAATTCCCATGGTGG  
ACA ACTATCTTAATTACAATAATTCTGGTTGTTTTGTTCTTGCTGTTGCTCCCTGCATC  
TGTAATTGTATAACTGGATTTGTTTCTAGCCGCATGAAAGCTTTTAAGTTACAAATGGTT  
GCTCAAACCTCTGCTACTGCTGTAGCTTCCTCCAGCTACTATTTGGGGCCCCTGGAACAG  
ATATCCTCAATATGA

>bos-env2-chr12-1

ATGGGCCTGATAACCTATGTGAGCTTACTTCTGCTGACTCCAAATATCCTGAGTCTGCCG  
TTGGATCCTCAAGACAATGTCTTCCTGTCCTGGGCTCACTCCTATGCTGCATTCCACAAT  
CGGTCTAACTGCTGGGTCTGCGGAGCGCTCCCCTCTTCGTCAGTGAAGGCTTCCCGTGG  
TGGACATCCCCACTTCAAGGAAAAGACTTTCCTCAAGTCTGTGAATACCTTCGACAACAA  
TCACATGCGATGCCTCTTCGTCATCTGATGACATCTACCAACCCTAAAATGGACTGGTGC  
AACACTTTGTACTCTAACTACGGACATAATGTGACTTTTAAATTTTGATTATACGTTGTCT  
CGGTTCAATGACTATTTTGCTACATATAAGGTAATAGGTCTAGATCTAATGGCTTTTTA  
CCTGACGTTTATCAAATATGGGATGAGGTTACATGGCTAACTCCTGAAAAGGACGTTTA  
ATATCTACTGCCTCTATATGCTGGGAACAAACAGAGCCGTCCCCAAAAGTTAGCCAACAA  
CTTAATTACAATGATTGGAACAAATGGGATATTTGTCTCGGAAACATGCAATGTAATC  
ATTCCCGTGTTCCTCAATCCCAGTTCAGGTTCTCCCTTTGTCTGGCCAGGCACGAATTGG  
GACTGGATATCTCAGTCGCGCTGGCTTGCTCCAAACGGA ACTTATTGGATATGTGGCTCT  
TACCTATGGGCATGGCTTCCCCCTGGTTGGATAGGGAGATGCACCCTGGGTCTAGCCTTT  
ACTCATGGCTTTATATTTTCAGAGCTTCAGAAAAGCCTGCTAATTTACCCACCTTAGA  
ACTCGGTGGGCAAGGTCTGTATTTTATTGGTATGATTATTTGGCTGCAGCGTTTGTTCCT  
TCTTTGGGAACTACAGATGTTATGTTACGAGTGGATGCTTTGACTAATTTTACTCAACAG  
GCATTACAAGATTCTCAAAGGCTATTTTCAGCTCTTAATGCTGAACAAGCACAAATTAGA  
AAGGTGGTTTTACAAAACAGATTGGCTCTAGACATTCTGACAGCTGCACAAGGAGGAACT  
TGTGCCATTATTCATACCCAATGCTGTACATATATACCTGATATGAGTACGAATGTTACT  
CATTTTACTAACCACATGAACAGGATGATTAGGGCCATGGACACTCCTGAAGCCTCAATT

GCTTCACTTTGGAAAACGTTAACTAATCCCCATGGTGGACAACTATCTTAATTACGATA  
ATTCTGGTTGTTTTGTTCTTGCTGTTTGCTCCCTGCATCTGTAATTGTATAACTGGATTT  
GTTTCTAGCCGCATGAAAGCTTTTAAGTTACAAATGGTTGCTCAAACCTCTGCTACTACT  
GTAGCTACCTCCAGCTACTATTTGGGGCCCCTGGATCAGATATCCTCAATATGA

>bos-env2-chr12-2

ATGGGCCTGATAACCTATGTGAGCTTACTTCTGCTGACTCCAAATATCCTGAGTCTGCCG  
TTGGATCCTCAAGACAATGTCTTCTGCTGCTGGGCTCACTCCTATGCTGCATTCCACAAT  
CGGTCTAACTGCTGGGTCTGCGGAGCGCTCCCCTCTTCGTCAGTGGAAAGGCTTCCCCTGG  
TGGACATCCCCACTTCAAGAAAAAGACTTTCTCCAAGTCTGTGAATACCTTCGACAACAA  
TCACATGCGATGCCTCTTCGTCATCTGATGACATCTACCAACCCTAAAATGGACTGGTGC  
AACACTTTGTACTCTAACTATGGACATAATGTGACTTTTAATTTTGATTATACGTTGTCT  
CGGTTCAATGACTATTTTGTACATATAAGGTAATAGGTCTAGATCTAATGGCTTTTTTA  
CCTGACGTTTATCAAATATGGGATGAGGTTACATGGCTAACTCCTGAAAAAGGACGTTTA  
ATATCTACTGCCTCTATATGCTGGGAACAAACAGAGCCGTCCCCAAAAGTTAGCCAACAA  
CTTAATTACAATGATTGGAACAAATGAGATATTTGTCTCGGGAACATGCAATGTAATC  
ATTTCCCGTGTTTTCCAATCCCAGTTCAGGTTCTCCCTTTGTCTGGCCAGGCACGAATTGG  
GACTGGATATCTCAGTCGCGCTGGCTTGCTCCAAACGGAACCTTATTGGATATGTGGCTCT  
TACCTATGGGCATGGCTTCCCCTGGTTGGATAGGGAGATGCACCCTGGGTCTAGCCTTT  
ACTCATGGCTTTATATTTTTCAGAGCTTCCAGAAAAGCCTGCTAATTTACCCACCTTAGA  
ACTCGGTGGGCAAGGTCTGTATTTTATTGGTATGATTATTTGGCTGCAGCGTTTGTCCC  
TCTTTGAGAACTACAGATGTTATGTTACGAGTAGATGCTTTGACTAATTTTACTCAACAG  
GCATTACAAGATTCTCAAAGGCTATTTTCAGCTCTTAATGCTGAACAAGCACAAATTTAAA  
AAGGTGGTTTTTACAAAACAGATTGGCTCTAGACATTCTGACAGCTGCACAAGGAGGAACT  
TGTGCCATTATTCATACCCAATGCTGTACATATATACCTGATATGAGTACGAATGTTACT  
CATTTTACTAACCACATGAACAAGATGATTAGGGCCATGGACACTCCTGAAGCCTCAATT  
GCTTCACTTTGGAAAACGTTAACTAATCCCCATGGTGGACAACTATCTTAATTACGATA  
ATTCTGGTTGTTTTGTTCTTGCTGTTTGCTCCCTGCATCTGTAATTGTATAACTGGATTT  
GTTTCTAGCCGCATGAAAGCTTTTAAGTTACAAATGGTTGCTCAAACCTCTGCTACTACT  
GTAGCTACCTCCAGCTACTATTTGGGGCCCCTGGATCAGATATCCTCAATATGA

>bos-env2-chr13

ATGGGCCTGATAACCTATGTGAGCTTACTTCTGCTGACTCCAAATATCCTGCGTCTGCCG  
TTGGATCCTCAAGACAATGTCTTCTGCTGCTGGGCTCACTCCTATGCTGCATTCCACAAT  
CGGTCTAACTGCTGGGTCTGCGGAGCGCTCCCCTCTTCATCAGTGGAAAGGCTTCCCCTGG  
TGGACATCCCCACTTCAAGGAAAAGACTTTCTCCAAGTCTGTGAATACCTTCGACAACAA  
TCACATGCGATGCCTCTTCGTCATCTGATGACATCTACCAACCCTAAAATGGACTGGTGC  
AACACTTTGTACTCTAACTATGGACATAATGTGACTTTTAATTTTGATTATACATTGTCT  
CGGTTCAATAACTATTTTGTACATATAAGGTAATAGGTCTAGATCTAATGGCTTTTTTA  
CCTGACGTTTATCAAATATGGGATGAGGTTACATGGCTAACTCCTGAAAAAGGACATTTA  
ATATCTACTGCCTCTATATGCTGGGAACAAACAGAGCCGTCCCCAAAAGTTAGCCAACAA  
CTTAATTACAATGATTGGAACAAATGGGATATTTGTCTCAGGAAACATGCAATGTAATC  
ATTTCCCGTGTTTTCCAATCCCAGTTCAGGTTCTCCCTTTGTCTGGCCAGGCACAAATTGG  
GACTGGATATCTCAGTCGCGCTGGCTTGCTCCAAACAGGACTTATTGGATATGTGGCTCT  
TACCTATGGGCATGCCTTCCCCTGGTTGGATAGGGAGATGCACCCTGGGTCTAGCCTTT  
ACTCATGGCTTTATATTTTTCAGAGCTTCCAGAAAAGCCTGCTAATTTACCCACCTTAGA  
ACTCGGTGGGCAAGGTCTGTATTTTATTGGTATGATTATTTGGCTGCAGCGTTTGTCCC  
TCTTTGGGAACTACAGATGTTATGTTACGAGTGGATGCTTTGACTAATTTTACTCAACAG  
GCATTACAAGATTCTCAAAGGCTATTTTCAGCTCTTAATGCTGAACAAGCACAAATTTAGA  
AAGGTGGTTTTTACAAAACAGATTGGCTCTAGATATTTCTGACAGCTGCACAAGGAGGAACT  
TGTGCCATTATTCATACCCAATGCTGTACATATATACCTGATATGAGCACGAATGTTACT  
CATTTTACTAACCACATGAACAAGATGATTAGGGCCATGGACACTCCTGAAGCCTCAATT  
GCTTCACTTTGGAAAACGTTAACTAATCCCCATGGTGGACAACTATCTTAATTACAATA  
ATTCTGGTTGTTTTGTTCTTGCTGTTTGCTCCCTGCATCTGTAATTGTATAACTGGATTT  
GTTTCTAGCCGCATGAAAGCTTTTAAGTTACAAATGGTTGCTCAAACCTCTGCTACTGCT  
GTAGCTTCTCCAGCTACTATTTGGGGCCCCTGGATCAGATATCCTCAATATGA

>bos-env2-chr14

ATGGGCCTGATAACCTATGTGAGCTTACTTCTGCTGACTCCAAATATCCTGAGTCTGCCG  
TTAGATCCTCAAGACAATGTCTTCCCTGTCCTGGGCTCACTCCTATGCTGCATTCCACAAT  
CGGTCTAACTGCTGGGTCTGCGGAGCGCTCCCCTCTTCGTCAGTGAAGGCTTCCCGTGG  
TGGACATCCCCACTTCAAGGAAAAGACTTTCTCCAAGTCTGTAAATACCTTCGACAACAA  
TCACATGCGATGCCTCTTCGTCATCTGATGACATCTACCAACCCTAAAATGGACTGGTGC  
AACACTTTGTACTCTAACTATGGACATAATGTGACTTTTAATTTTGATTATACATTGTCT  
CGGTTCAATGACTATTTTGTACATATAAGGTAATAGGTCTAGATCTAATGGCTTTTTTA  
CCTGACGTTTATCAAATCTGGGATGAGGTTACATGGCTAACTCCTGAAAAAGGACGTTTA  
ATATCTACTGCCTTTATATGCTGGGAACAAACAGAGCCGTCCCCAAAAGTTAGCCAACAA  
CTTAATTACAATGATTGGAAACAAATGGGATATTTGTCTCAGGAAACATGCAATGTAATC  
ATTCCCTGTGTTTTCCAATCCCAGTTCGGTCTCCCTTTGTCTGGCCAGGCACAAATTGG  
GACTGGATATCTCAGTCGCGCTGGCTTGCTCCAAACGGGACTTATTGGATATGTGGCTCT  
TACCTATGGGCACGGCTCCCCCTGGTTGGATAGGGAGGTGCACCCTGGGTCTAGCCTTT  
ACTCATGGCTTTATATTTTTCAGAGCTTCCAGAAAAGCCTGCTAATTTACCCACCTTAGA  
ACTCGGTGGGCAAGGTCTGTATTTTATTTGGTATGATTATTTGGCTGCAGCGTTTGTCCC  
TCTTTGGGAACTACAGATGTTATGTTACGAGTGGATGCTTTGACTAATTTTACTCAACAG  
GCATTACAAGATTCTCAAAGGCTATTTTCAGCTCTTAATGCTGAACAAGCACAAATTAGA  
AAGGTGGTTTTACAAAACAGATTGGCTCTAGACATTCTGACAGCTGCACAAGGAGGAACT  
TGTGCCATTATTCATACCCAATGCTGTACATATATACCTGATATGAGCACGAATGTTACT  
CATTTTACTAACCACATGAACAGGATGATTAGGGCCATGGACACTCCTGAAGCCTCAATT  
GCTTCACTTTGGAAAACGTTAACTAATCCCCATGGTGGACAACACTATCTTAATTACGATA  
ATTCTGGTTGTTTTGTTCTTGCTGTTTTGCTCCCTGCATCTGTAATTGTATAACTGGATTT  
GTTTCTAGCCGCATGAAAGCTTTTAAGTTACAAATGGTTGCTCAAACCTCTGCTACTACT  
GTAGCTACCTCCAGCTACTATTTGGGGCCCCTGGATCAGATATCCTCAATATGA

>bos-env2-chr15-1

ATGGGCCTGATAACCTATGTGAGCTTACTTCTGCTGACTCCAAATATCCTGAGTCTGCCG  
TTGGATCCTCAAGACAATGTCTTCCCTGTCCTGGGCTCACTCCTATGCTGCATTCCACAAT  
CGGTCTAACTGCTGGGTCTGCGGAGCGCTCCCCTCTTCGTCAGTGAAGGCTTCCCGTGG  
TGGACATCCCCACTTCAAGGAAAAGACTTTCTCCAAGTCTGTGAATACCTTCGACAACAA  
TCACATGCGATGCCTCTTCGTCATCTGATGACATCTACCAACCCTAAAATGGACTGGTGC  
AACACTTTGTACTCTAACTATGGACATAATGTGACTTTTAATTTTGATTATACATTGTCT  
CGGTTCAATGACTATTTTGTACATATAAGGTAATAGGTCTAGATCTAATGGCTTTTTTA  
CCTGACGTTTATCAAATATGGGATGAGGTTACATGGCTAACTCCTGAAAAAGGACGTTTA  
ATATCTACTGCCTCTATATGCTGGGAACAAACAGAGCCGTCCCCAAAAGTTAGCCAACAA  
CTTAATTACAATGATTGGAAACAAATGGGATATTTGTCTCAGGAAACATGCAATGTAATC  
ATTCCCGTGTTCCTCAATCCCAGTTCGGTCTCCCTTTGTCTGGCCAGGCACGAATTGG  
GACTGGATATCTCAGTCGCGCTGGCTTGCTCCAAACGGGACTTATTGGATATGTGGCTCT  
TACCTATGGGCATGGCTCCCCCTGGTTGGATAGGGAGATGCACCCTGGGTCTAGCCTTT  
ACTCATGGCTTTATATTTTTCAGAGCTTCCAGAAAAGCCTGCTAATTTACCCACCTTAGA  
ACTCGGTGGGCAAGGTCTGTATTTTATTTGGTATGATTATTTGGCTGCAGCGTTTGTCCC  
TCTTTGGGAACTACAGATGTTATGTTACGAGTGGATGCTTTGACTAATTTTACTCAACAG  
GCATTACAGGATTCTCAAAGGCTATTTTCAGCTCTTAATGCTGAACAAGCACAAATTAGA  
AAGGTGGTTTTACAAAACAGATTGGCTCTAGATATTTCTGACAGCTGCACAAGGAGGAACT  
TGTGCCATTATTCATACCCAATGCTGTACATATATACCTGATATGAGCACGAATGTTACT  
CATGTTACTAACCACATGAACAAGATGATTAGGGCCATGGACACTCCTGAAGCCTCAATT  
GCTTCACTTTGGAAAACGTTAACTAATCCCCATGGTGGACAACACTATCTTAATTACAATA  
ATTCTGGTTGTTTTGTTCTTGCTGTTTTGCTCCCTGCATCTGTAATTGTATAACTGGATTT  
GTTTCTAGCCGCATGAAAGCTTTTAAGTTACAAATGGTTGCTCAAACCTCTGCTACTGCT  
GTAGCTTCCCTCCAGCTACTATTTGGGGCCCCTGGATCAGATATCCTCAATATGA

>bos-env2-chr15

ATGGGCCTGCTAACCTATGTGAGCTTACTTCTGCTGACTCCAAATATCCTGAGTCTGCCG  
TTGGATCCTCAAGACAATGTCTTCCCTGTCCTGGGCTCACTCCTATGCTGCATTCCACAAT  
CGGTCTAACTGCTGGGTCTGCGGAGCGCTCCCCTCTTCGTCAGTGAAGGCTTCCCGTGG  
TGGACATCCCCACTTCAAGGAAAAGACTTTCTCCAAGTCTGTGAATACCTTCGACAACAA  
TCACATGCGATGCCTCTTCGTCATCTGATGACATCTACCAACCCTAAAATAGACTGGTGC

AACACTTTGTACTCTAACTATGGACATAATGTGACTTTTAATTTTGATTATACGTTGTCT  
CGGTTCAATGACTATTTTGCTACATATAAGGTAAATAGGTCTAGATCTAATGGCTTTTTA  
CCTGACGTTTATCAAATATGGGATGAGGTTACATGGCTAACTCCTGAAAAAGGACGTTTA  
ATATCTACTGCCTCTATATGCTGGGAACAAACAGAGCCGTCCCCAAAAGTTAGCCAACAA  
CTTAATTACAATGATTGGAAACAAATGGGATGTTTGTCTCAGGAAACATGCAATGTAATC  
ATCCCGTGTTTTCCAATCCCAGTTCAGGTTCTCCCTTTGTCTGGCCAGGCACGAATTGG  
GACTGGATATCTCAGTCGCGCTGGCTTGCTCCAAACGGAACCTTATTGGATATGTGGCTCT  
TACCTATGGGCATGGCTTCCCCCTGGTTGGATAGGGAGATGCACCCTGGGTCTAGCCTTT  
ACTCATGGCTTTATATTTTTCAGAGCTTCCAGAAAAGCCTGCTAATTTACCCACCTTAGA  
ACTCGGTGGGCAAGGTCTGTATTTTATTGGTATGATTATTTGGCTGCAGCGTTTGTCCC  
TCTTTGGAAACTACAGATGTTATGTTACGAGTAGATGCTTTGACTAATTTTACTCAAAAG  
GCATTACAAGATTCTCAAAGGCTATTTTCAGCTCTTAATGCTGAACAAGCACAAATTAGA  
AAGGTGGTTTTACAAAACAGATTGGCTCTAGACATTCTGACAGCTGCACAAGGAGGAACT  
TGTGCCATTATTCATAACCAATGCTGTACATGTATACCTGATATGAGCACGAATGTTACT  
CATTTTACTAACCACATGAACAAGATGATTAGGGCCATAGACACTCCTGAAGCCTCAATT  
GCTTCACTTTGGAAAACGTTAACTAGTTCCCCATGGTGGACAACCTATCTTAATTACAATA  
ATTCTGGTTGTTTTGTTCTTGCTGTTTGGCTCCCTGCATCTGTAATTGTATAACTGGATTT  
GTTTCTAGCCGCATGAAAGCTTTTAAGTTACAAATGGTTGCTCAAACCTCTGCTACTACT  
GTAGCTTCTCCAGCTATTATTTGGGGCCCCTGGATCAGATATCCTCAATATGA

>bos-env2-chr21

ATGACAGACAGTAGGCTTCTTAAGTATCAGTCATTGTTGTTAGAAGGACCAGTAACTAAG  
CTTAAAGTTTGTGGAAATTTAAATCCTGCCACTTTCCCTCCTGAGAAGGAAAATGAAACA  
CCTGATCAGGATTGTTCTCAATTCCTAACCTTAAACTATGCAGCTCGGGAAGATCTAAAG  
GATACCCATTAGACAATCCGGACATGGAATATTTACAGATGGCAGTTCTTTTGTTCAG  
GATGGAAAGCGTAAAGCAGGTTATGCCGTGGTACTGCTGAACAGGTTTTGGAAAGCAAAA  
TCTCTCCCCCAGGGAACCAGTGCTCAGTTAGCGGAGCTTGTGGCCCTGACCCGAGCTCTA  
GAGTTAAGCAAAGGGCAGCAGATGGGCCTGATAATCTATGTGAGTCTACTTCTGCTGACT  
CCAAATATCCTGAGTCTGCTGTTGTATCCTCAAGACAATATATTCCTGTCTGGGCTCAC  
TCCTATGCTGCATTCCACAATCGGTCTAACTGCTGGGTCTGCCGAGCGCTCCCCCTTTCG  
TCAGTGGAAAGGCTTCCCGTGGTGGACATCCCACCTCAAGGAAAAGACTTTCTCCAAGTC  
TGTGAATACCTTCGACAACAATCACATGCGATGCCTCTTCGTCATCTGATGACATCTACC  
AACCTAAAATGGACTGGTGAACACTTTGTACTCTAACTATGGACATAATGTGACTTTT  
AATTTTGATTATACATTGTCTCGGTTCAATGACTATTTTGCTACATATAAGGTAAATAGG  
TCTAGATCTAATGGCTTTTTACCTGACGTTTATCAAATATGGGATGAAGTTACATGGCTA  
ACTCCTGAAAAAGGACGTTTAATATCTACTGCCTTTATATGCTGGGAACAAACAGAGCCG  
TCCCCAAAAGTTAGCCAACAACCTAATTACAATGATTGGAAACAAATGGGATATTTGTCT  
CAGGAAACATGCAATGTAATCATTCCCTGTGTTTTCCAATCCCAGTTCCGGTTCTCCCTTT  
GTCTGGCCAGGCACGAATTGGGACTGGATATCTCAGTCGCGCTGGCTTGTCCAAACGGG  
ACTTATTGGATATGTGGCTCTTACCTATGGGCATGGCTCCCCCTGGTTGGATAGGGAGG  
TGCACCCTGGGTCTAGCCTTTACTCATGGCTTTATATTTTCAGAGCTTCAGAAAAGCCT  
GCTAATTTACCCACCTTAGAACTCGGTGGGCAAGGCTGTATTTCAATTGGTATGATTAT  
TTGGCTGCAGCGTTTGTCCCTCTTTGGGAACTACAGATGTTATGTTACGAGTGGATGCT  
TTGACTAATTTTACTCAACAGGCATTACAGGATTCTCAAAGGCTATTTTCAGCTCTTAAT  
GCTGAACAAGCACAAATTAGAAAGGTGGTTTTACAAAACAGATTGGCTCTAGATATTCTG  
ACAGCTGCACGAGGAACTTGTGCCATTATTCATAACCAATGCTGTACATATATACCTGAT  
ATGAGCACGAATGTTACTCATTTTACTAACCACATGAACACGATGATTAGGGCCATGGAC  
ACTCCTGAAGCCTCAATTGCTTCACTTTGGAAAACGTTAACTAATTCCCCATGGTGGACA  
ACTATCTTAATTACAATAATTCTGGTTGTTTTGTTCTTGCTGTTTGTCCCTGCATCTGT  
AATTGTATAACTGGATTTGTTTCTAGCCGCATGAAAGCTTTTAAGTTACAAATGGTTGCT  
CAAACCTCTGCTACTGCTGTAGCTTCTCCAGCTACTATTTGGGGCCCCTGGAACAGATA  
TCCTCAATATGA

>bos-env2-chr25

ATGTCTTCCCTGTCTGGGCTCACTCCTATACTGCATTCCACAATTGGTCTAACTGCTGGG  
TCTGTGGAGCACTCCCCTTCAAGTGGAAGGCTTCCCTGTGGTGGACATCCCCACTTCAA  
GTAAAAGACTTTCTCCAAGTCTGTGAATACCTTCGACAACAATCACATGCGATGCCTCTT

CTTCATCTGATGACATTTACCAACCCTAAAATGGACTGGTGAACACTTTGTA CTCTAAC  
TATGGACATAATGTGACTTTTAATTTTGGTTATACATTGTCTCAGTTCAATGACTATTTT  
GCTACATATAAGGTAAATAGGTCTAGATCTAATGGTTTTTTACCTGACGTTTATCAAATA  
TGGGATGAGGTTATATGGCTAACTCCTGAAAAAGGACGTTAATATCTACTGCCTCCATA  
TGCTGGAAACAAACAGAGCCGTCCCCAAAAGTTAGCCAACAACCTTAATTACAGTGATTGG  
AAACAATTGGGATTTTTGTCTCAGAAAACATGCAATGTAATCATTCCCCTGTTTTCCAAT  
CCCAGTTCACGTTCTCCCTTTGTCTGGCCAGACACAAATTGGGACTGGATATCTCAGTCA  
CGCTGGCTTGCTCCAAACGGAACCTATTGGATATGTGGTTCTTACCTATGGGCATGGCTC  
CCCCCTGGTTGGATAGGGAGATGCACCCTGGGTCTAGCCTTTACTCATGGCTTTATATTT  
TCAGAGCTTCCAGAAAAGCCTGCTAATTTACCCTACCTTAAAACCTCGGTGGGCAAGTTCT  
GTATTTTCATTGGTATGATTATTTGGCTGCAGCGTTTGTCCCTCTTTGGGAACTACAGAT  
GTTATGTTACGAGTGGATGCTTTGACTAATTTTACTCAACAGGCATTACAAGATTCTCAA  
AAGGCTATTTTCAGCTCTTAATGCTGAACAAGCACAAATTAGAAAAGGTGGTTTTTACAAAAC  
AGATTGGCTCTAGATATTCTGACAGCTGCACAAGGAGGAACTTGTGCCATTATTCATACC  
CAATGCTGTACATATATACCTGATATGAGCACGAATGTTACTCATTTTACTAACCACATG  
AACAAGATGATTAGGGCCATGGATACTCCTGAAGCCTCAATTGCCCTCACTTTGGGAGACG  
TTAACTAGTTCCCATGGTGGACAACCTATCTTAATTACAATAATTCTGGTTGTTTTGTTC  
TTGCTGTTTGCTCCCTGCATCTGTAATTGTATAACTGGATTTGTTTCTAGCCGCATGAAA  
GCTTTTAAAGTTACAAATGGTTGCTCAAACCTCTGCTACTGCTGTAGCTTCCCTCAAAC  
TATTTGGGGACCCTGGATCAGATATCCTCAATATGA

>bos-env2-chr4

ATGACTTTAAGACAATTGAGAGGATTTTTGGGAATCACAGGTTACTGTCGCATTTGGATT  
CCAGGTTATGGGGAACCTTGCCCGGCCTTTATATAAACTTATAGCTGAAACTCAGCAGGCC  
CAAACCTGACAACTGGTTTGGTCTCCAGAGACTCAAAGGCTTTTAAGGTTCTTCAGACT  
GCTCTCCTGCAAGCTCCAGCTCTGAGCTTGCCACAGGGTCAGAATTTAATTTGTTTGT  
ACTGAAAGAAAAGGTGTGGCATTGGGAGTTTTGACACAACCCCGAGGGCCTCACCAGCAA  
CCTATTGCTTATCTAAGCAGAGAATTAGATGTAGTTTCATGTGGGTGGCCCACTGCCTA  
AGAGTAATTGGGGCAGCGGCTTTATTAGCACCTGAAGCTTTAAAAATAATTAATGGACGA  
AACCTTACTGTACTGACTTCTCATGATGTGAGTGGAACTTAAATTTCTAAGGTTAATATT  
TGGATGACAGACAGTAGGCTTCTTAAGTATCAGTCATTGTTGTTAGAAGGACCAGAAGTT  
AAGCTTAAAGTTTGTGGAAATTTAAATCCTGCCACTTCCCTCCTGAGAAGGAAAATGAA  
ACACCTGATCACGATTGTTCTCAATTCCTAACTTTAAACTATGCAGCTCGGGAGGATCTA  
AAGGATATCCCATTAGACAATCCTGACATGGAAATATTTACAGATGGCAGTTCTTTTGT  
CGGGATGGAAAGCGTAAAGCAGGTTATGCCATGGTACTGCTGAACAGGTTTTTGGAAAGCA  
AAATCTCTCCCAAGGGAACAGTGCTCAGTTAGCAGAGCTTGTGGCCCTGACCCAAGCT  
CTAGAGTTAAGCAAAGGGCAGCGGATGGCCTGATAATCTATGTGAGCTTACTTCTGCTG  
ACTCCAAATATCCTGAGTCTGCCATTGGATCCTCAAGACAATGTCTTCTGTCTGGGCT  
CACTCCTACGCTGCATTCCACAATCGGTCTAAGTGCTGGGTCTGCGGAGAGCTCCCCTCT  
TCGTCAAGTGAAGGCTTCCCCTGGTGGACATCCCCACTTCAAGGAAAAGACTTTCTCAA  
GTCTGTGAATACCTTCGACAACAATCACATGCGATGCCTCTTCTTCATCTGATGACATCT  
ACCAACCCTAAAATGGACTGGTACAACACTTTGTA CTCTAACTATGGACATAATGTGACT  
TTTAATTTTGATTATACATTGTCTCGGTTCAATGACTATTTTGTCTACATATAAGGTAAT  
AGGTCTAGATCTAATGGTTTTTTACCTGACATTTATCAAATATGGGATGAGGTTACATGG  
CTAACTCCTGAAAAAGGACGTTAATATCTACTGCCTCTATATGCTGGGAACAAACAGAG  
CCATCCCCCAAAGTTAGCCAACAACCTTAATTACAATGATTGGAAACAAGTGGGATATTTG  
TCGCAGGAAACATGCAATGTAATCATTCCCCTGTTTTCCAATCCCAGTTCAGGTTCTCCC  
TTTGTCTGGCCAGGCACGAATTGGGACTGGATATCTCAGTCACGCTGGCTTGCTCCAAAC  
GGGACTTACTGGATATGTGGCTCTTACCTATGGGCATGGCTTCCCCCTGGTTGGATAGGG  
AGATGCACCCTGGGTCTAGCCTTTACTCACGGCTTTATATTTTTCAGAGCTTCCAGAAAAG  
CCTGCTAATTTACCCACCTTAGAACTCGGTGGGCAAGGTCTGTATTTTATTGGTATGAT  
TATTTGGCTGCAGCGTTTGTCCCTCTTTGGGAACTACAGATGTTATGTTACGAGTGGAT  
GCTTTGACTAATTTTACTCAACAGGCATTACAAGATTCTCAAAGGCTATTTTCAGCTCTT  
AATGCTGAACAAGCACAAATTAGAAAAGGTGGTTTTTACAAAACAGATTGGCCTTAGATATT  
CTGACAGCTGCACAAGGAGGAACTTGTGCCATTATTCATACCCAGTGTGTACATATATA  
CCTGATATGAGCACGAATGTTACTCATTTTACTAACCACATGAACAAGATGATTAGGGCC

ATGGACACTCCTGAAGCCTCAATTGCTTCACTTTGGGAAACGTTAACTAGTTCCCCATGG  
TGGACAACCTATCTTAATTACAATAATTCTCGTTGTTTTGTTCTTGCTGTTTGCTCCCTGC  
ATCTGTAATTGTATAACTGGATTTGTTTCTAGCCGCATGAAAGCTTTTAAGTTACAAATG  
GTTGCTCAAACCTCCTGCTACTGCTGTAGCTTCTCCAGCTACTATTTGGGGCCCCTGGAT  
CAGATATCCTCAATATGA

>bos-env2-chrX

ATGGGCCTGATAACCTATGTGAGCTTACTTCTGCTGACTCCAAATATCCTGAGTCTGCCG  
TTGGATCCTCAAGACAATGTCTTCCCTGTCCTGGGCTCACTCCTATGCTGCATTCCACAAT  
CGGTCTAACTGCTGGGTCTGCGGAGCGCTCCCCTCTTTGTCAGTGGAAAGGCTTCCCATGG  
TGGACATCCCCACTTCAAGGAAAAGACTTTCTCCAAGTCTGTGAATACCTTCGACAACAA  
TCACATGCGATGCCTCTTCTTCATCTGATGACATCTACCAACCCTAAAATGGCCTGGTGC  
AACACTTTGTACTCTAACTATGGACATAATGTGACTTTTAATTTTGATTATACATTGTCT  
CGGTTCAATGACTATTTTGCTACATATAAGGTAAATAGGTCTAGATCTAATGGTTTTTTA  
CCTGACGTTTATCAAATATGGGATGAGGTTACATGGCTAACTCCTGAAAAAGGACGTTTA  
ATATCTACTGCCTCTATATGCTGGGAACAAACAGAGCTGTCCCCAAAAGTTAGCCAACAA  
CTTAATTACAATGATTGGAAACAAGTGGGATATTTGTCTCAGGAAACATGCAGTGAATC  
ATCCCCGTGTTTTCCAATCCCAGTTCAGGTTCTCCCTTTGTCTGGCCAGGCACGAATTGG  
GACTGGATATCTCAGTCGCGCTGGCTTGCTCCAAACGGGACTTATTGGATATGTGGCTCT  
TACCTATGGGCATGGCTTCCCCTGGTTGGGTAGGGAGATGCACCCTGGGTCTAGCCTTT  
ACTCATGGCTTTATATTTTTCAGAGCTTCCAGAAAAGCCTGCTAATTTACCCACCTTAGA  
ACTTGGTGGGCAAGGTCTGTATTTTATTTGGTATGATTATTTGGCTGCAGCGTTTGTCCC  
TCTTTGGGAACTACAGATGTTATGTTACGAGTGGATGCTTTGACTAATTTTACTCAACAG  
GCATTACAAGATTCTCAAAAGGCTATTTTCAGCTCTTAATGCTGAACAAGCACAAATTAGA  
AAGGTGGTTTTACAAAACAGATTGGCTCTAGATATTCTGACAGCTGCACAAGGAGGAACT  
TGTGCCATTATTCATACCCAGTGTGTACATATACCTGATATGAGCACGAATGTTACT  
CATTTTACTAACCACATGAACAAGATGATTAGGGCCATGGACACTCCTGAAGCCTCAATT  
GCTTCACTTTGGAAAACGTTAACTAACTCCCCTATGGTGGACAACCTATCTTAATTACAATA  
ATTTCTGGTTGTTTTGTTCTTGCTGTTTTGCTCCCTGCATCTGTAATTGTATAACTGGATTT  
GTTTCTAGCCGCATGAAAGCTTTTAAGTTACAAATGGTTGCTCAAACCTCCTGCTACTATG  
TAG

>bos-env3

ATGTGTTCTACTCCTAGGGTGCTATTTCCCTCTGCACTGCCTAAATAACAGCCCCATGACT  
CCTCTGTTCCCTCATCCTTGCTGCACTCCCCAGCCTTCTGGCTACTCCCTGCCCTGCTCA  
GACATTTATTCCTGTGTACATTCCTCATGTTATAATACAGCTCCAAAACCATGCACCATG  
AACCTCAGGGGCGGGAAGTCCAAATCCCTACTCACTGTTAGAGTACAAAAGAGAGGGAGT  
TTCATGAGTACCTGCCATAAGCCAAATGGAAGAAACATATGTTTCTATCCCATTACCTAC  
TGGGGGTA CTGATGGGGGCAGGGTACTAGATCAAAAATCGGGAAAAGAAACAAGAACAA  
GTCATAAAGAACATAATTTCCCAGTTACAGGCGACCCCTGAGCCTTATAAACGCCTAGAC  
CTCCTTTTCCAATTATGGCCTCTCCTAAAATCTCCCTCTGGCAACCAACACCTTACCCGC  
CTTCTCAACTCTTCTTCCAATTCTTCCAGTGCACACAACACACATCCCAATGTTGGATA  
TGCATGTCACTGTCTCCCTCACCGCACATAGCAATTCCTTTACCTTCAATCTGGCTGTCA  
CAGGGCAACTATACCTCCCCTTCCAACAAAAAACTGCACAACCTATTGGGCCAGTCTCT  
GACAATGTCCTACTCTCAGCCTCTCAAACCTAACCTGTATCAACTACTCTAGTCCCAAC  
TAACTGGTCTTACAAACTCTGCTCCCTCCTTCTTTTCCACTTGTGTCCACAGCACAAAT  
AATTGCACCAATCTGGAAATCTTCATTCTCTGCGGGACCTATGCATATTCATGTCTCCCC  
TTGGACCCCCCTGGAACCTTGCATCTTGGTCTTCTGACCCCAGGCCTAACATTCCTCAA  
GAAGAGGTAGAACAAATAGTCTACCCCCAAGGGGAACCTTTCCACAGGAAAAGAAGCGCT  
GTCATAGCCCCCTGCTGATTGGGACTGGCTTAGCAGTAGCCCTAGGCACCGGGATTGGA  
GGCATCTCGACCTCTGTCCATTTCTACTACAAGCTGTCCCAAGAACCTAATGAAGACATG  
GAGCAAGTAGTGGAGTCCCTTCGTTTTCAATCCAAAGACAAATTAACCTATTAGCTTCTGTG  
GCCCTACAAAATACGCGAGCCCTGGACCTTCTCACCGCAGAAAAGGGAGGGACCTGCCTT  
TTCCTAGGAGAGGACTGCTGCTATTTTGTTAATGAAATGGGCACAGTCCAGGGCAGAGTC  
AAAGAACCTTAGAGACAGAATTGAATGCCGCAGAAAAGAGTTACAAAACCTTTACAGTCCC  
CAAAACCTGTTCCAACAGGCCCTCCCTTGGTTGCTCCCTTTCCTGGGACCATTGGTACTT  
ATCATTCTGTTCCCTCTTATTTGGACACTGTCTCTTCAATCTCTTTCAAAGTTTTCTCAA

GAACGGATTCAGGCCATCTCTCGAGATTATGTCAAGACCATTCCTTCTTCTCGAGAGCCTC  
ATCCCAAGCTCAGAAAAAGGAGACCCTGGGCCCTAG

>bos-env4

ATGTCACAGCCCCCAGGCATCTGGTCCCTCCACTGCCACGACCACAAAAAAGGAAGGGA  
CCTCCTCTACCTCCACTCCCTCCGCCAACACGGGAAGCCCAGCTGATCTCTAGACGAATG  
ACACCAGAGATCCTGGATGAACAGGAAGAGGAACCACCACCAGACAGATGTCACAACCTC  
TGTATAAGAGATATTGTTCTCCCTAATTCCTTACCCACAGGAAATCACCGGGATGTCCT  
ACGCGGGCCACTCAACAAGCCTCTATACCTACCTGGGGACAGATTAAGACGCTTTGTCAC  
CAGGCACAAGGGATAGCTTCCCTGCAGGGCTCTCCAGTCTCTCCGGAGAGAGTGTTTATT  
GCTATGCTTGCCTTACTATCTTGCCAGGTAAGCGCCTCCTCTCCCGCTCCAGAAAAGTAT  
TGGGCATACTTCCAGATCCTCCAACCTTCCAAGTAGTTACTTGGAACAATGCCCTATA  
CGGGTCCACACAAACCAGCCTCATTTATTGGGAGGACATTATACTTTCTATACAGAGGAG  
GAATACCCTATTAATTTCAATTATACCTTTAGGGGATTAACAGATGATCTCCCTGTTTGT  
TTTAACTTCCCTTTTGATCATAACAGGAAAGCTATATTACTCCTACCAAAGAAGGATGTATT  
GGAGCCTCTGAAAAAGCAATTATAACAGATTCTCCATCCTTAAGATATCGGTCAGTTTGG  
GTATTACTGGCTCGTATGCCTGGGATCCTTGACCCCTATAAATCCCTGCATTTTAAATCT  
CCACCAAATATCCAAATTGTCATAATGCTGCCCTTCAGATGCCATATGGAAAACCTATA  
GATGGTCATTCAGGATATCCGATTTGGAAATCTTGTACTTATAATTCTAGAATTGACTAC  
AGAATACCAGGAGGAAATTATACCATTACAGGACTGGAGCAACCCGGATCCAGGTCAGGAT  
CCAATGATTGATGATGCATTTAAAGGGAGATTTGACAATTGGAAAGAATATTCAGTTCCCT  
TGGCCATTACGCGCCACTAGATGGCATCGTAATCAATTTGTTCCCTCCTATGCTGTCTTAT  
ACGGCTAAGGGCAGAACTTATTGGCAACCAGAAATTTGGAAGGCCCTTACCGCTACTGCC  
CCTATTACCTTAAACCCGGCCAGAAAATATTTCTACTTATTCTATTTTAGCTTGTCTACCC  
TCGCCTTATGTTTTTCTCTTCACTAATGATTCCAAGAGACTTAATATACACATGAATTAT  
TCAGGTGGACCTAATATAGTAACTTGTGAACAATGTATGCTCTCATCTTGTTTGGCCCT  
CAATATAATGTTTGTCTTTTTGTGGTGTGCAACGCCACCCTATCTTATGGTGCCTGTA  
ACTATAACTACACATTGGTATGATAACTATGGTCTTGTCTGTAATACAACAAGTGGGGAT  
TTAATGCGATCACGACGGTTAGCGGGCTTACTTTTACTGGGAATAGCAACTTTAATAACT  
GGAATTACTTCTGTTTATATGGCAGCAGTTTCATTGACTGAACAAGTACACACTGCTCAA  
TATGTTGATGCTATGTCCAAAAATGTTTCTTTAGCATTGGCAACAGAGGAAGCTATATTC  
AGGAAGCTGGAGATGAGGATAGATGCCCTAGAGGAAGCAATATTGCATATTGGAAATGAA  
TTGCAGGCTTTAAAAGTGAGATTGGCACTGTCCTGTCATGCCGACTATCGGTGGATTTGT  
GTAACACCCTGAAAGTAAATGAGACAGATTATGACTGGCAAAAAATTA AAAATCATATT  
TTAGGTGTCTGGAACAGCTCCGACATTAGTTTAGATTTAAGGAACTTCACAGTCAAATA  
ACAACCATAGAACGCTCTCACTTAGATTTTACTGCCTCAGGAGTAGCAAGTGACTTCTTC  
CATAAATCTCTAACTTTGTTTCAGGAAAGTACTTTCTGTCTGCTATTTTTAACTATGCT  
GCTGTGGCCGCTATAATTCTGCTTATCATATTCATTCTTCCTTGTATTGTCAGAATTTTC  
CGACAGAGCATTGAGAAGCTCGAGACTGAATTGCATACGGGTTTCTTAAGAAATAAAAAT  
GGGGGAGATGCCGGGACCCAGCACGGGAGTTCCACCCATGA

>Bos-env5-chr18

ATGAGCAGGGGACGGATCCGCCACCAAACAGATGTCTCAACTTCACATACAGGATATCG  
CTCCCCCGATCCTTTGCCTCACAAAAGGAGGTCAGGCCGCCTGACTCAGGCGACCCGGA  
ATGCCTCCATACCTACTTGGGGACAAATAAAAACACTCTGCCATCAGGCACGGGGAATAA  
CCTCTTTGCAGGGCTCTCCAACCTCCCCTGAGAAGATGTTTATTGCTATGCTTGCCTTAT  
TATCATGCCAGGTAAGCGCCTCCTCCCCACTCCTGAAAAGTATTGGGCTTACTTCCAG  
ACCTCCAACCTTTCAAGTAGTTACCTGGAACAGTGACCCCTACGGGTCCACACAAACC  
AGCCTCAGTTACTGGGAGGGTCATATACTTCCCTATACCACAGACGAATATCCTATTAATT  
TCAATTTTACCTTACGGGATTAGCAGACGACCTTCTGTTTGTTCAACTTCCCCAGTG  
ATATAGAAAGCTTTATTATTTCCCCTAAAGAAGGATGTGTCGGAGCCTCTAAAAGGCAG  
TTCTGACTCATTCTCCAGCCTCAGGTATTGAACATAGAGGGCGTCTAGCGCTTTGGATTT  
TACAGGCTCGTATGCCCGGGGCCCTTGATCCCCACGAACTTATAATCCATAGACCCCTC  
CTGGATATCCAAGTTGTTATAAATACCGAGCCTTCAGATGCCATATGGAACACTATAGATG  
ATCGTACAGGGTATCCGATTTGGAAATCTTGTACTTATCGTTTAAAGAGCTGATTACAGAA  
TACCGGGAGGAGGAAATTACATGATTCAAGATTGGAGTAACTCAGACCTAGATAGGAGCC  
CATTGCCCTTGATGACTTCCCAGCAGATTTTATAATTGGAAGAAAGATTTGGTTTCTT

GGCCTTTAAGCATTACTAGATGGCATAATAATCGATTTGTTTCGCCTATATTGTCTTATA  
CAACTAAGAACAGAACCTCTTGGCAGCCAGAAATTTGGAGGGCCCTTGCTGCCACCGCTC  
CCATTTCCCTTATTCCGTCCAAATAGCAATTCTACTTATTCTGTTTTAGCTTGTGTACCC  
CGCCTTATGTTTTTCTCTTTACTAATGACTCCAAAAGATTAATGTACACATGAATTATT  
CAGGTGGACCTAATATTGTAACCTGTGAACAATGTATGCTTTCATCTTGTGTTGACCCCGC  
AATAAATGTTTGTCTTTTGTGTGTGTTGAAACGCCACCCTATCTCATGATACCTGTGT  
CTGTGCATTCTTATTGGTATGATAATTACGGTTTGGCTGTATTACAACAACTGCAGGATT  
TAATGCGAACACGACGGTTTGTGGGCTTACTTATCTTGGGAATAGCAGCTTTGATAAGTG  
CAATTACTTCTGTTACTGTGGCAGCAATATCATTGACTCAACAAGTACATACTGCTCAAT  
ATGTTGATTCTATGTCCAAAAATGTTTCTTTAGCATTGGCAACACAGGAAGCTATAGACA  
GAAAATTAGAGATGAGGGTAGACGCCCTAGAGGAAGCAGTAATACATATTGGGACTGAAT  
TGCAGGCTTTAAAGGTGAAAATGGCATTGTCCTGTCATGCTGACTACCGGTGGATATGTG  
TAACACCCCTGAAAGTAAATGAGACAGATTTTGAATGGGAAAAGATTA AAAACCATATTT  
CAGGTATTTGGAACAGCTCTGACATTAGCTTAGACTTAGGGAAACTTCACAATCAAATAG  
CAACCCTGGAACACTCCCGATTAGATTTTACTGCCGCTGGAACAGCAAATGATTTCTTCC  
ATACTTTCTCTAACTACATTTT CAGGAAAAAATATTCTGTCTACCTTCTCGGCTACGCTA  
CCTTGGCTGTTTTAATTTTTATTCTAATAATCATTCTTCCTTGTATTGTCAGGATTCTTC  
GGCAGAGCATT CAGAGGCTCGCGACTGAGCTACATCTGGCTGTTTTAAGAAATAAAAAAG  
GGGGAGATGCGGGGAGCCGGTGA

>bos-env5-chr24

ATGTCTCAGCCTCTCGGATACCGAGTTCCACGGCCGCCGCGACCCCGAAAGAGGAAAGGG  
CCTCCTCTGCCTTCGCTCCCCCGCCAGCACGGGAAACACCACTGACATCGGAGCAACTG  
ACATCGGGGATCCCGGATGAGCAGGGGACGGATCCGCCACCAAACAGATGTCTCAACTT  
CACATACAGGATATCGCTCCCCCGATCCTTTGCCTCACAAAAGGAGGTCAGGCCGCCTG  
ACTCAGGCGACCCGGAATGCCTCCATACCTACTTGGGGACAAATAAAAACACTCTGCCAT  
CAGGCACGGGGAATAACCTCTTTGCAGGGCTCTCCAACCTCCCTGAGAAGATGTTTATT  
GCTATGCTTGCCTTATTATCATGCCAGGTAAGCGCCTCCTCCCCACTCCTGAAAAGTAT  
TGGGCTTACTTCCCAGACCCTCCAACCTTCAAGTAGTTACCTGGAACAGTGACCCCTA  
CGGGTCCACACAAACCAGCCTCAGTTACTGGGAGGGTCATATACTTCTTATACCACAGAC  
GAATATCCTATTAATTTCAATTTTACCTT CAGGGGATTAGCAGACGACCTTCTGTTTGT  
TTCAACTTCCCAGTGATATAGAAAGCTTTATTATTTCCCCTAAAGAAGGATGTGTGCGA  
GCCTCTAAAAAGGCAGTTCTGACTCATTCTCCAGCCTCAGGTATTGAACATAGAGGGCGT  
CTAGCGCTTTGGATTTTACAGGCTCGTATGCCCGGGGCCCTTGATCCCACGAACTTATA  
ATCCATAGACCCGCTCCTGGATATCCAAGTTGTTATAATACCGAGCCTT CAGATGCCATA  
TGGAACACTATAGATGATCGTACAGGGTATCCGATTTGGAAATCTTGTACTTATCGTTTA  
AGAGCTGATTACAGAATACCGGGAGGAGGAAATTACATGATTCAAGATTGGAGTAACTCA  
GACCTAGATAGGAGCCCATTGCCCTTGATGACTTTCCAGCAGATTTTATAATTGGAAG  
AAAGATTTGGTTTCTTGGCCTTTAAGCATTACTAGATGGCATAATAATCGATTTGTTTCG  
CCTATATTGTCTTATACAACTAAGAACAGAACCTCTTGGCAGCCAGAAATTTGGAGGGCC  
CTTGCTGCCACCGCTCCCATTTCTTATTCCGTCCAAATAGCAATTCTACTTATTCTGTT  
TTAGCTTGTGTACCCTCGCCTTATGTTTTTCTCTTTACTAATGACTCCAAAAGATTAAT  
GTACACATGAATTATTCAGGTGGACCTAATATTGTAACCTGTGAACAATGTATGCTTCCA  
TCTTGTGTTGACCCCCCAATATAATGTTTGTCTTTTGTGTGTTGAAACGCCACCCTAT  
CTCATGATACCTGTGTCTGTGCATTCTTATTGGTATGATAATTACGGTTTGGCTGTATTA  
CAACAACCTGCAGGATTTAATGCGAACACGACGGTTTGTGGGCTTACTTATCTTGGGAATA  
GCAGCTTTGATAAGTGCAATTACTTCTGTTACTGTGGCAGCAATATCATTGACTCAACAA  
GTACATACTGCTCAATATGTTGATTCTATGTCCAAAAATGTTTCTTTAGCATTGGCAACA  
CAGGAAGCTATAGACAGAAAATTAGAGATGAGGGTAGACGCCCTAGAGGAAGCAGTAATA  
CATATTGGGACTGAATTGCAGGCTTTAAAGGTGAAAATGGCATTGTCCTGTCATGCTGAC  
TACCGGTGGATATGTGTAACACCCCTGAAAGTAAATGAGACAGATTTTGAATGGGAAAAG  
ATTA AAAACCATATTT CAGGTATTTGGAACAGCTCTGACATTAGCTTAGACTTAGGGAAA  
CTTCACAATCAAATAGCAACCCTGGAACACTCCCGATTAGATTTTACTGCCGCTGGAACA  
GCAAATGATTTCTTCCATACTTTCTCTAACTACATTT CAGGAAAAAATATTCTGTCTACC  
TTCTCGGCTACGCTACCTTGGCTGTTTTAATTTTTATTCTAATAATCATTCTTCCTTGT  
ATTGTCAGGATTCTTCGGCAGAGCATT CAGAGGCTCGCGACTGAGCTACATCTGGCTGTT

TTAAGAAATAAAAAAGGGGAGATGCGGGAGCCGGTGA
